# Supplementary material for: Glucose–Thymidine Ratio as a Metabolism Index Using 18F-FDG and 18F-FLT PET Uptake as a Potential Imaging Biomarker for Evaluating Immune Checkpoint Inhibitor Therapy
Source: MDPI journal article supplement (doi:10.3390/ijms23169273), 2022-08-17
Supplement: s1 [file s1]

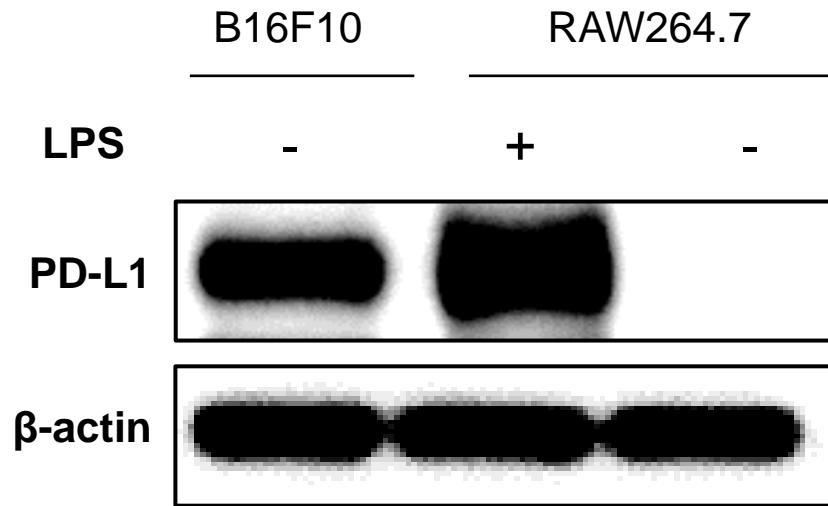

**Figure S1:** Western blot analysis was performed using RAW264.7 and mouse melanoma B16F10 following LPS treatment to confirm PD-L1 expression. PD-L1 expression was confirmed in LPS-treated RAW264.7 and similar expression was confirmed in B16F10.

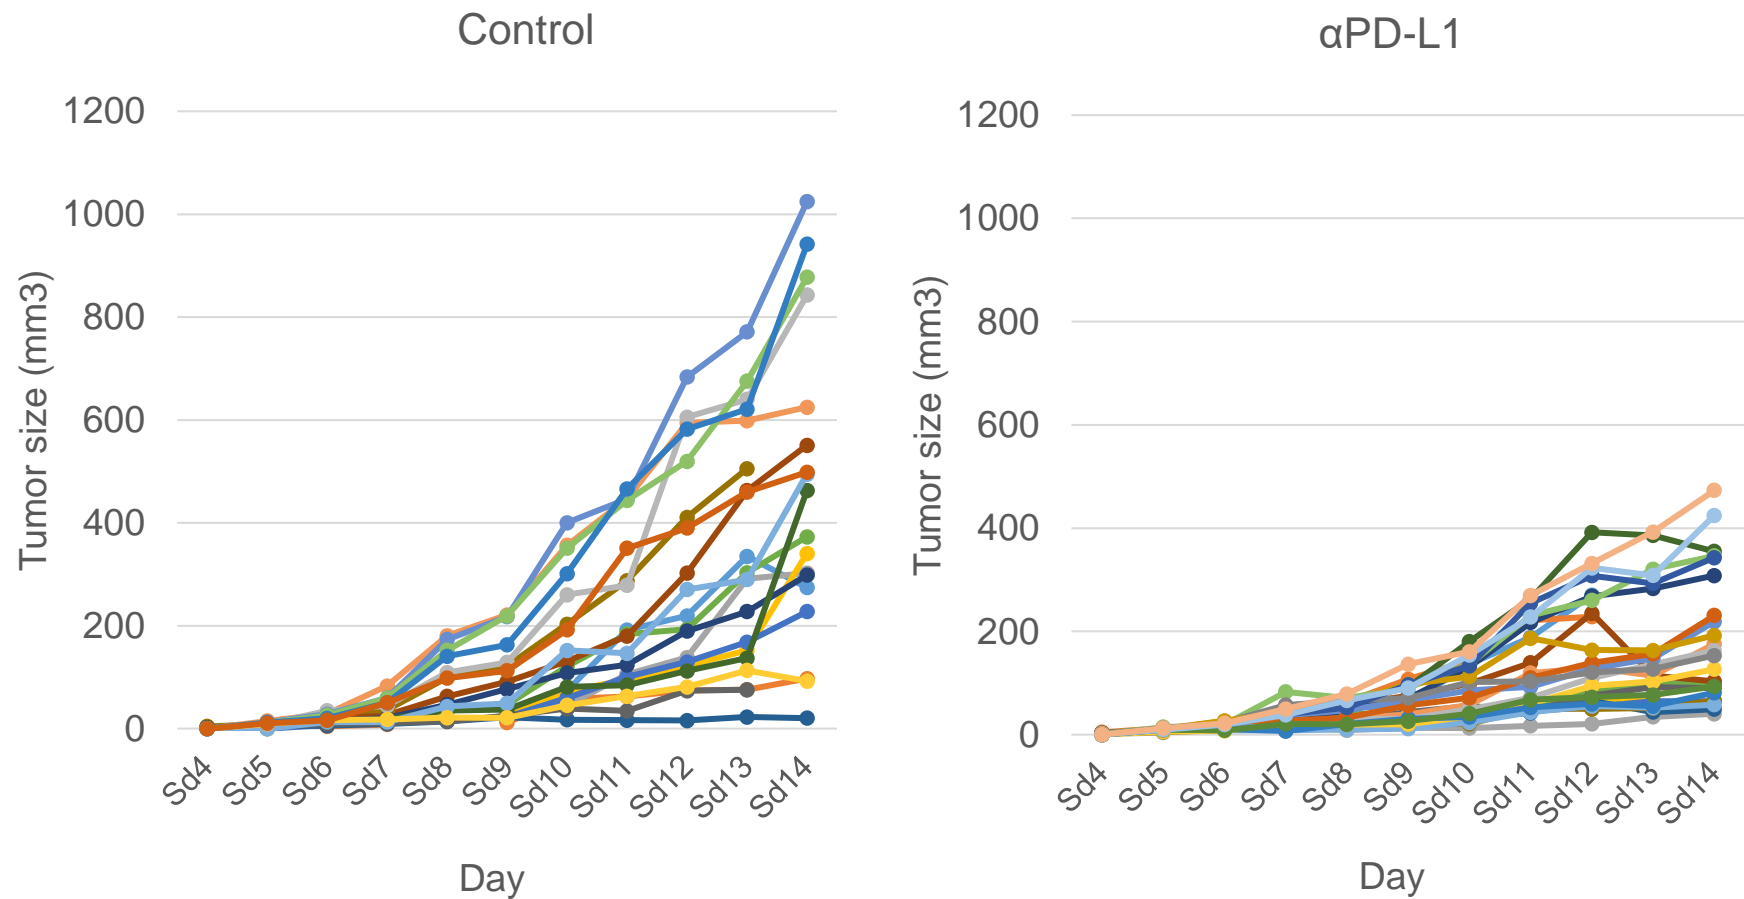

**Figure S2.** Individual tumor growth graph. It was confirmed for each individual that the tumor growth of ICI treatment group was inhibited compared to the control group.

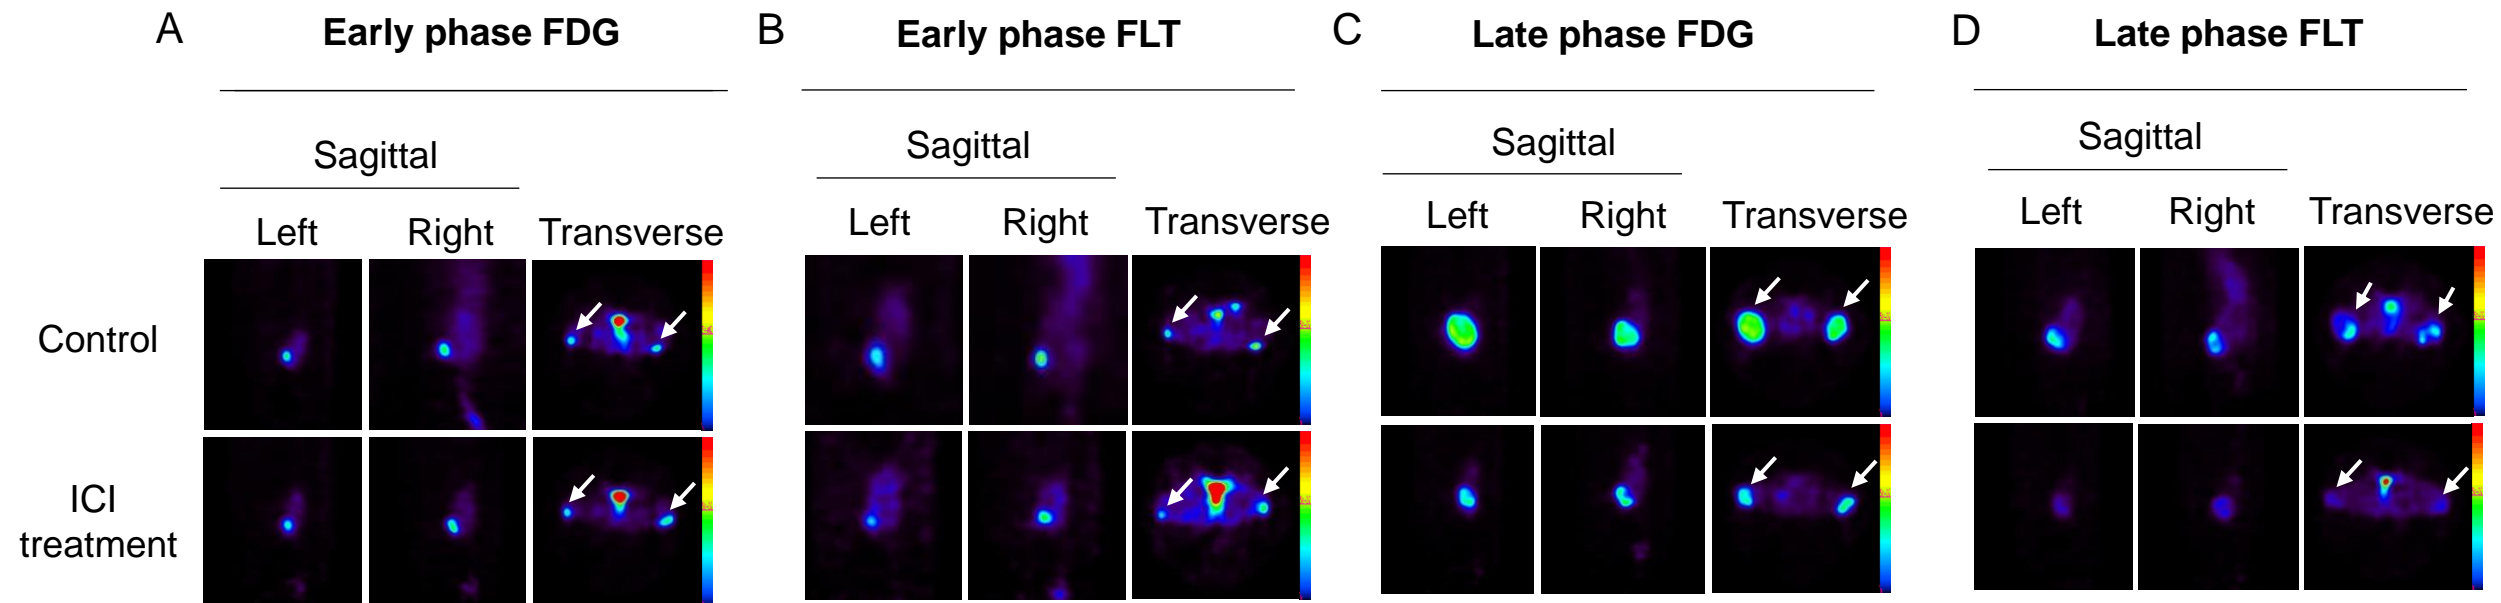

**Figure S3.** PET images of sagittal and transverse of each individual in the early and late phases of ICI treatment. (A)  $^{18}\text{F}$ -FDG PET showed high TBR (Target to Background Ratio) on PET images (sagittal, transverse) in the ICI-treated group in the early phase , but  $^{18}\text{F}$ -FLT PET showed no significant difference between the two groups (B). (C)  $^{18}\text{F}$ -FDG PET in the late phase of ICI treatment showed with high TBR (sagittal, transverse) in both groups. (D) On the other hand,  $^{18}\text{F}$ -FLT PET showed less tumor uptake in the ICI treatment group than in the control group. The white arrow indicates the tumor uptake lesion.
